# Supplementary material for: Tropical insectivorous birds’ predation patterns that promote forest–farmland trophic connectivity for integrated top–down pest biocontrol
Source: Frontiers journal article supplement (doi:10.3389/fenvs.2023.1194267), 2023-07-27
Supplement: Table_1.docx [file Table_1.docx]

**Supplementary Table S1.** Checklist of passerine birds identified from the study area. Names follow the nomenclature according to BirdLife International and NatureServe (2011)

| ***Scientific name*** | **Family** | **Habitat association** | **Diet guild** |
| --- | --- | --- | --- |
| *Chloropeta natalensis* | Acrocephalidae | Farmland | Obligate insectivore |
| *Hippolais pallida* | Farmland | Obligate insectivore |
| *Eminia lepida* | Cisticollidae | Farmland | Obligate insectivore |
| *Cisticola erythrops* | Farmland | Obligate insectivore |
| *Cisticola cantans* | Farmland | Obligate insectivore |
| *Prinia subflava* | Farmland | Obligate insectivore |
| *Prinia bairdii* | Forest | Obligate insectivore |
| *Bathmocercus rufus* | Forest | Obligate insectivore |
| *Laniarius luehderi* | Forest | Obligate insectivore |
| *Camaroptera chloronota* | Forest | Obligate insectivore |
| *Camaroptera brachyura* | Forest | Obligate insectivore |
| *Estrilda astrild* | Estrildidae | Farmland | Omnivore |
| *Spermophaga ruficapilla* | Forest | Omnivore |
| *Psalidoprocne albiceps* | Hirundinidae | Farmland | Obligate insectivore |
| *Hirundo smithii* | Farmland | Obligate insectivore |
| *Lanius collaris* | Laniidae | Farmland | Obligate insectivore |
| *Lanius mackinnoni* | Farmland | Obligate insectivore |
| *Tchagra australis* | Malaconotidae | Forest | Obligate insectivore |
| *Laniarius aethiopicus* | Forest | Obligate insectivore |
| *Laniarius erythrogaster* | Forest | Omnivore |
| *Motacilla aguimp* | Motacillidae | Farmland | Obligate insectivore |
| *Anthus trivialis* | Farmland | Obligate insectivore |
| *Muscicapa adusta* | Muscicapidae | Farmland | Obligate insectivore |
| *Cercotrichas hartlaubi* | Farmland | Obligate insectivore |
| *Melaenornis edolioides* | Farmland | Obligate insectivore |
| *Bradornis pallidus* | Farmland | Obligate insectivore |
| *Saxicola rubetra* | Farmland | Obligate insectivore |
| *Cossypha heuglini* | Farmland | Obligate insectivore |
| *Cercotrichas leucophrys* | Farmland | Obligate insectivore |
| *Cossypha polioptera* | Forest | Obligate insectivore |
| *Sheppardia aequatorialis* | Forest | Obligate insectivore |
| *Cossypha cyanocampter* | Forest | Obligate insectivore |
| *Alethe poliocephala* | Forest | Obligate insectivore |
| *Cossypha natalensis* | Forest | Omnivore |
| *Cossypha niveicapilla* | Forest | Omnivore |
| *Nectarinia cuprea* | Nectaniriidae | Farmland | Obligate insectivore |
| *Nectarinia kilimensis* | Farmland | Omnivore |
| *Nectarinia mariquensis* | Farmland | Omnivore |
| *Nectarinia senegalensis* | Farmland | Omnivore |
| *Nectarinia venusta* | Farmland | Omnivore |
| *Nectarinia verticalis* | Forest | Omnivore |
| *Nectarinia olivacea* | Forest | Omnivore |
| *Illadopsis albipectus* | Pellomeidae | Forest | Obligate insectivore |
| *Illadopsis rufipennis* | Forest | Obligate insectivore |
| *Dendropicos fuscescens* | Picidae | Farmland | Obligate insectivore |
| *Dendropicos goertae* | Farmland | Obligate insectivore |
| *Campethera nivosa* | Forest | Obligate insectivore |
| *Batis minor* | [Platysteiridae](https://en.wikipedia.org/wiki/Wattle-eye) | Farmland | Obligate insectivore |
| *Platysteira cyanea* | Forest | Obligate insectivore |
| *Platysteira jamesoni* | Forest | Obligate insectivore |
| *Platysteira concreta* | Forest | Obligate insectivore |
| *Ploceus baglafecht* | Ploceidae | Farmland | Omnivore |
| *Ploceus nigricollis* | Farmland | Omnivore |
| *Ploceus ocularis* | Farmland | Omnivore |
| *Ploceus cucullatus* | Farmland | Omnivore |
| *Ploceus xanthops* | Farmland | Omnivore |
| *Ploceus melanocephalus* | Farmland | Omnivore |
| *Amblyospiza albifrons* | Forest | Omnivore |
| *Phyllastrephus cabanisi* | Pycnonotidae | Forest | Obligate insectivore |
| *Bleda syndactylus* | Forest | Obligate insectivore |
| *Phyllastrephus hypochloris* | Forest | Obligate insectivore |
| *Andropadus virens* | Forest | Omnivore |
| *Andropadus masukuensis* | Forest | Omnivore |
| *Andropadus latirostris* |  | Forest | Omnivore |
| *Elminia longicauda* | Stenostiridae | Forest | Obligate insectivore |
| *Elminia nigromitrata* | Forest | Obligate insectivore |
| *Neocossyphus poensis* | Turdoides | Forest | Obligate insectivore |
| *Turdoides plebejus* | Farmland | Omnivore |
| *Turdus pelios* | Farmland | Omnivore |

*Not considered as a true New World Warbler; FFE = Farmland-Forest-Edge
